# Supplementary material for: Galactooligosaccharide pretreatment alleviates damage of the intestinal barrier and inflammatory responses in LPS-challenged mice
Source: Royal Society of Chemistry journal article supplement (doi:10.1039/d0fo03020a), 2021-01-01
Supplement: d0fo03020a1.pdf [file d0fo03020a1.pdf]

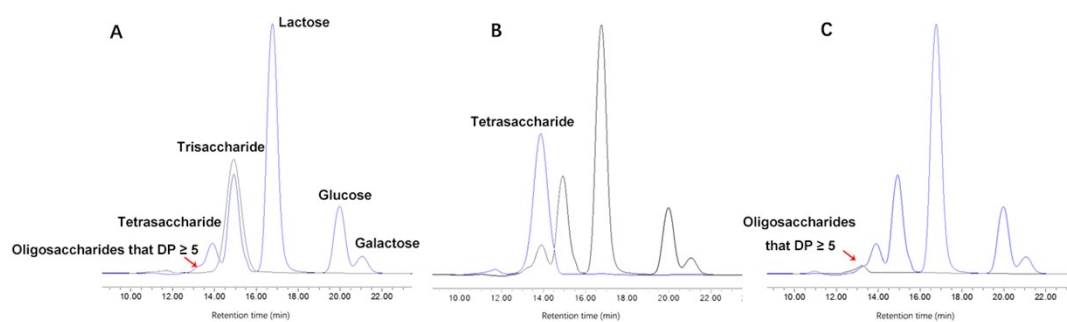

**Figure S1.** HPLC of single component of trisaccharide (A), tetrasaccharide (B), and oligosaccharides that DP  $\geq$  5 (C). The lactose hydrolysate was used for an reference, i.e. the blue line in (A), (C) and black line in (B).
